# Supplementary material for: Dietary capsaicin normalizes CGRP peptidergic DRG neurons in experimental diabetic peripheral neuropathy
Source: PubMed Central journal article supplement (PMC7814129; doi:10.1038/s41598-021-81427-w), 2021-01-18
Supplement: 41598_2021_81427_MOESM2_ESM.pdf [file 41598_2021_81427_MOESM2_ESM.pdf]

# **Dietary capsaicin preserves CGRP peptidergic DRG neurons in experimental diabetic peripheral neuropathy**

**Authors:** Xiao-Yi Zhang<sup>1</sup>, Zheng Guo<sup>1,2,3, \*</sup> Tu-Ping Li<sup>2</sup>, Tao Sun<sup>2</sup>

1. Department of Anesthesiology, Shanxi Medical University, 86 Xinjiannan Road, Taiyuan 030001, Shanxi, China
2. Department of Anesthesiology, Second Hospital of Shanxi Medical University, 382 Wuyi Road, Taiyuan 030001, Shanxi, China
3. Key Laboratory of Cellular Physiology (Shanxi Medical University), National Education Commission, Shanxi Medical University, 86 Xinjiannan Road, Taiyuan 030001, Shanxi, China

## **Emails of the authors:**

Xiao-Yi Zhang, [zhangxiaoyi229@163.com](mailto:zhangxiaoyi229@163.com)

Zheng Guo, [guozheng713@yahoo.com](mailto:guozheng713@yahoo.com)

Tu-Ping Li, [litutu001@163.com](mailto:litutu001@163.com)

Tao Sun, [572462311@qq.com](mailto:572462311@qq.com)

**\*Corresponding author:** Prof. Zheng Guo, Email: [guozheng713@yahoo.com](mailto:guozheng713@yahoo.com)

**Table S1** Fluorescence intensity of TRPV1 and CGRP in DRG and spinal cord [n = 6; Mean (SD)]

|     | TRPV1               |                      |                      |                       | CGRP                |                      |                      |                       |
|-----|---------------------|----------------------|----------------------|-----------------------|---------------------|----------------------|----------------------|-----------------------|
|     | Ctrl                | Ctrl+Cap             | Db                   | Db+Cap                | Ctrl                | Ctrl+Cap             | Db                   | Db+Cap                |
| DRG | 4180.65<br>(155.13) | 5075.67*<br>(176.02) | 2609.31*<br>(133.87) | 3944.33*&<br>(59.91)  | 3603.38<br>(95.69)  | 4763.67*<br>(175.57) | 2190.00*<br>(205.51) | 3258.00*&<br>(137.70) |
| SC  | 5735.30<br>(102.84) | 7198.00*<br>(171.19) | 3598.36*<br>(264.48) | 5032.00*&<br>(163.45) | 5051.33<br>(149.23) | 6855.00*<br>(127.49) | 2938.38*<br>(56.24)  | 4708.65*&<br>(138.59) |

Ctrl = control; Ctrl+Cap = non-diabetic animals treated with capsaicin; Db = diabetic; Db+Cap = diabetic animals treated with capsaicin; DRG = dorsal root ganglia; SC = spinal cord; \* =  $p < 0.05$ , compared with control; & =  $p < 0.05$ , compared with diabetic

**Table S2** Proportion of small neurons of TRPV1<sup>+</sup>/TRPV1<sup>-</sup> in the DRG [n = 6; Mean (SD)]

| TRPV1 <sup>+</sup> /TOSN |            |            |             | TRPV1 <sup>-</sup> /TOSN |            |            |             |
|--------------------------|------------|------------|-------------|--------------------------|------------|------------|-------------|
| Ctrl                     | Ctrl+Cap   | Db         | Db+Cap      | Ctrl                     | Ctrl+Cap   | Db         | Db+Cap      |
| 15.6(2.6)                | 19.2(2.6)* | 11.0(2.1)* | 15.7(1.6)&# | 84.4(2.6)                | 80.8(2.6)* | 89.0(2.1)* | 84.3(1.6)&# |

TRPV1<sup>+</sup> = small neurons immunoreactive for TRPV1; TRPV1<sup>-</sup> = small neurons not immunoreactive for TRPV1; TOSM = total small neurons observed; Ctrl = control; Ctrl+Cap = non-diabetic animals treated with capsaicin; Db = diabetic animals; Db+Cap = diabetic animals treated with capsaicin; DRG = dorsal root ganglia; \* =  $p < 0.05$ , compared with control; & =  $p < 0.05$ , compared with diabetic; # =  $p < 0.05$ , compared with Ctrl+Cap

**Table S3** Proportion of small neurons of CGRP<sup>+</sup>/CGRP<sup>-</sup> in the DRG [n = 6; Mean (SD)]

| CGRP <sup>+</sup> /TON |           |            |             | CGRP <sup>-</sup> /TON |           |            |             |
|------------------------|-----------|------------|-------------|------------------------|-----------|------------|-------------|
| Ctrl                   | Ctrl+Cap  | Db         | Db+Cap      | Ctrl                   | Ctrl+Cap  | Db         | Db+Cap      |
| 21(4.2)                | 22.7(2.6) | 16.2(0.6)* | 18.6(2.4)&# | 79.0(4.2)              | 77.3(2.6) | 83.8(0.6)* | 81.4(2.4)&# |

CGRP<sup>+</sup> = small neurons immunoreactive for CGRP; CGRP<sup>-</sup> = small neurons not immunoreactive for CGRP; TOSM = total small neurons observed; Ctrl = control; Ctrl+Cap = non-diabetic animals treated with capsaicin; Db = diabetic animals; Db+Cap = diabetic animals treated with capsaicin; DRG = dorsal root ganglia; \* =  $p < 0.05$ , compared with control; & =  $p < 0.05$ , compared with diabetic; # =  $p < 0.05$ , compared with Ctrl+Cap
